# Supplementary material
Source: Elsevier journal article supplement (https://www.sciencedirect.com/science/article/pii/S1887836917300546)
Supplement: mmc1 [file S1887836917300546:mmc1.pdf]

## ANEXO 1. CONSENTIMIENTO INFORMADO

### HOJA INFORMATIVA Y CONSENTIMIENTO INFORMADO

La Acupuntura es una técnica milenaria que trata a las personas de una forma holística o integral, puesto que se basa en la libre circulación de la energía por los distintos canales que recorren el cuerpo. Cuando esta energía, que tiene dos polaridades, yin y yang, se estanca o no están en equilibrio, puede aparecer la enfermedad.

Este estudio pretende mostrar como con la inserción de agujas en puntos sensibles de los canales energéticos, se pueden obtener efectos beneficiosos y positivos  
para.....  
.....

Estas técnicas son totalmente inocuas para el paciente, ya que al practicarlas se tiene en cuenta el aspecto global y el estado general de la persona a la que va dirigida.

Por tanto,  
Yo:.....

He leído, entendido y he realizado las preguntas que he considerado necesarias ante lo expuesto anteriormente y estoy de acuerdo en participar en el estudio  
:.....  
.....en el que se me practicarán sesiones de acupuntura.

Que estas sesiones no tienen que incidir en ningún aspecto negativo en mi salud y que por el contrario, pueden mejorar mi estado general.

Por último afirmo que puedo abandonar este estudio en cualquier momento que lo considere oportuno, sea cual sea la fase en la que me encuentre.

Acupuntor:

Paciente:

En.....a.....de.....de 2....
