# Supplementary material
Source: Elsevier journal article supplement (https://www.sciencedirect.com/science/article/pii/S1887836917300546)
Supplement: mmc2 [file S1887836917300546:mmc2.pdf]

## **ANEXO 2a. RECOGIDA DE DATOS**

### **CASO CLÍNICO Nº**

1. **Introducción del caso:** (En cuatro líneas explicar de que va el caso)

**Sexo, edad, estado civil, convivencia, profesión.**

2. **Motivo de consulta:**

**Síntomas / Duración / Tractamiento/ profesionales o terapeutas consultados/ pruebas complementaries realizadas/ Resultados analíticos**

3. **Antecedentes personales:**

(Cronologicament desde el nacimiento hasta la actualidad ordenados por edad del paciente)

Alergias

Enfermedades

Intervenciones quirúrgicas

Accidentes

Historia ginecológica

Tractamiento actual (farmacos, rehabilitación,...)

4. **Habitos:**

**Alimentación/ dieta**

**Habito deposicional**

**Descanso/ Horas de sueño**

**Habitos toxicos**

**Ejercicio físico**

**Actividades/ costumbres**

**Trabajo/ horarios**

5. **Antecedentes familiares:**

**Padre**

**Madre**

**Hermanos**

**Pareja**

**Hijos**

**Otros familiares**

**Situación familiar**

## Situación laboral

### 6. Exploración:

**General** (aspecto, peso, altura, IMC, postura, movimientos, voz, actitud)

#### Lengua

- Cuerpo
  - o Color
  - o Forma
  - o Humedad
  - o Aspecto
- Capa
  - o Calidad
  - o Color
  - o Consistencia
  - o Humedad

| Pulsos         | Mano izquierda | Mano derecha |
|----------------|----------------|--------------|
| Cun (distal)   | ID<br>C        | IG<br>P      |
| Guan (medio)   | VB<br>H        | E<br>B       |
| Chi (proximal) | V<br>R         | V<br>R       |

#### Puntos dolorosos (ashi)

#### Otras observaciones:

## 7. Diagnostico según los 5 elementos:

(colocar síntomas, enfermedades y antecedentes en el elemento correspondiente)

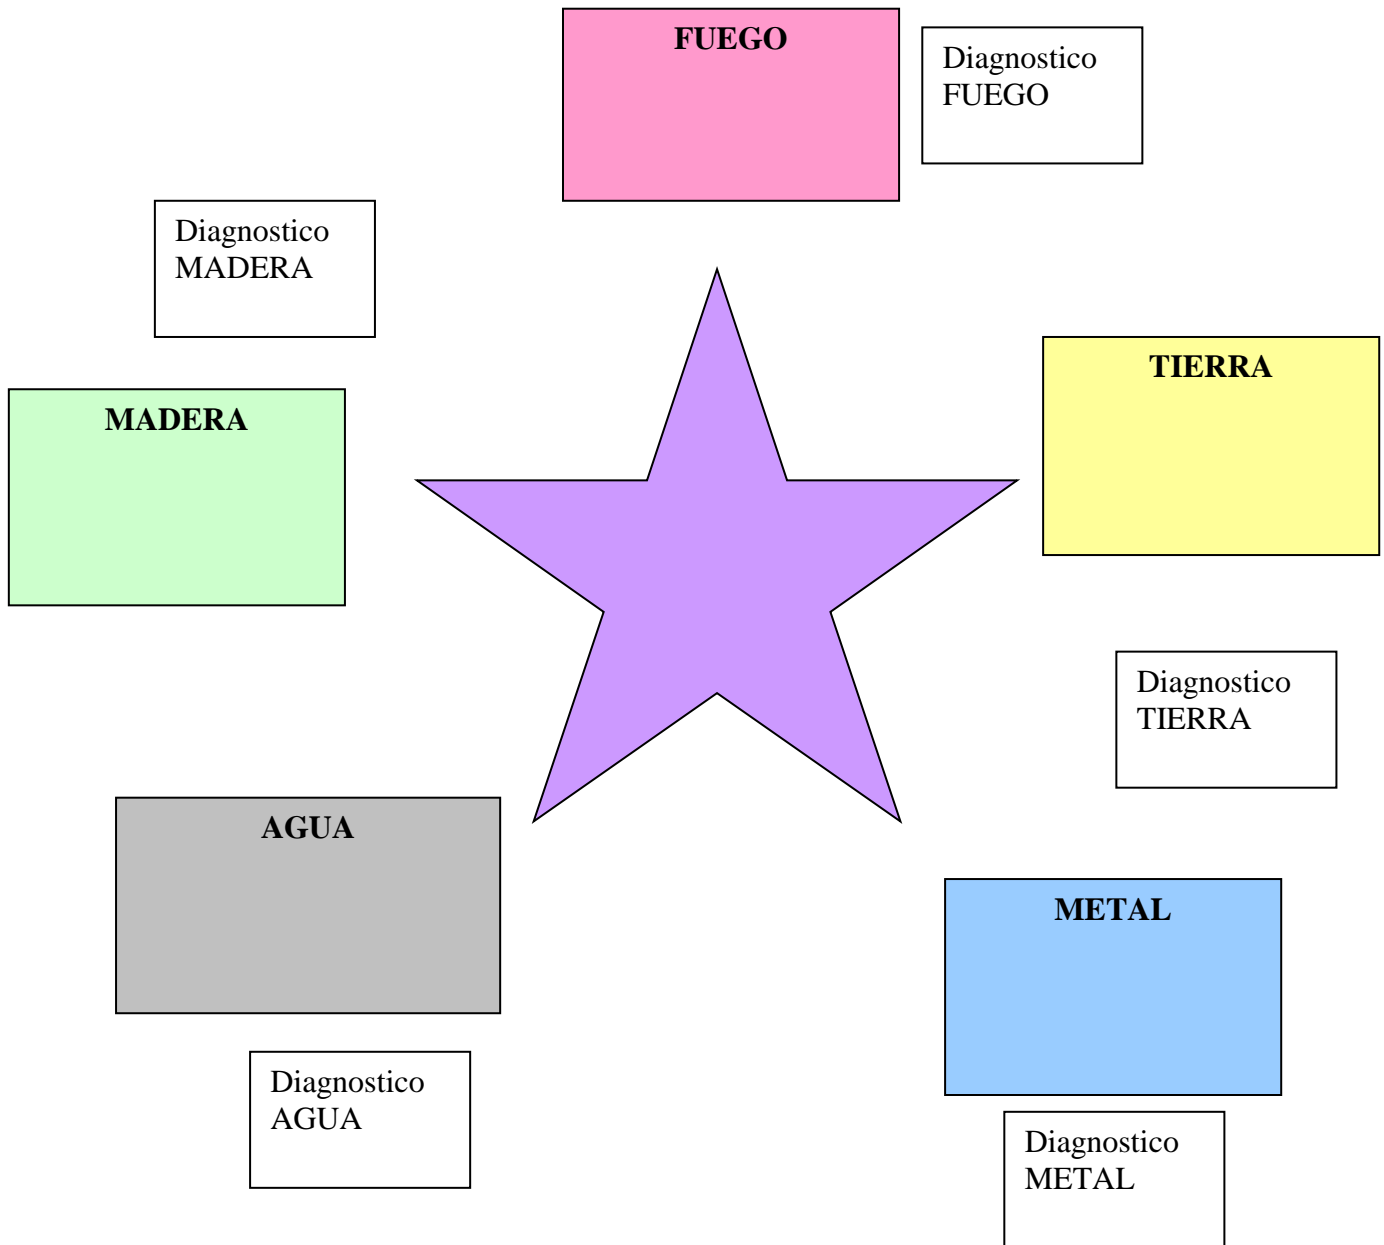

## **8. Tratamiento según los principios terapéuticos**

- FUEGO: (ejemplo: dispersar el Yang de C i tonificar el Yin de C)
- TIERRA:
- METAL:
- AGUA:
- MADERA:

## **9. Puntos elegidos y función energética** (explicando el porqué de cada punto)

(ejemplo: C5 punto Luo de C, aumenta el Yin y dispersa el Yang ID)

(Completar con otras técnicas de tratamiento)

- Auriculoterapia:
- Tuina, martillo, ventosas, moxa,...

## **10. Otros consejos:**

**Dieta**

**Habitos**

**Fitoterapia**

## **11. EVOLUCIÓN DEL CASO:**

Aquí se tiene que resumir lo que se ha realizado en las sesiones y como ha evolucionado el paciente. (Tienen que haber un mínimo de 5 sesiones)

- 1.
- 2.
- 3.
- 4.
- 5.

## **12. VALORACIÓN I CONCLUSIONES:** (Importante hacer una breve valoración del caso)

**Anexo 2b – Guía de consulta según los elementos.**

|                       | <b>Metal</b>                                                                                                                                             | <b>Agua</b>                                                                                                                                                                                                                                                                                                 | <b>Madera</b>                                                                                                                                                                                                             | <b>Fuego</b>                                                                                                                                                                        | <b>Tierra</b>                                                                                                                                                                                                                                                                           |
|-----------------------|----------------------------------------------------------------------------------------------------------------------------------------------------------|-------------------------------------------------------------------------------------------------------------------------------------------------------------------------------------------------------------------------------------------------------------------------------------------------------------|---------------------------------------------------------------------------------------------------------------------------------------------------------------------------------------------------------------------------|-------------------------------------------------------------------------------------------------------------------------------------------------------------------------------------|-----------------------------------------------------------------------------------------------------------------------------------------------------------------------------------------------------------------------------------------------------------------------------------------|
| <b>Cabeza</b>         | Nariz. Moco. Rinitis. Pólipos. Epistaxis<br>Olfato<br>Faringe. Laringe. Voz<br>Esclerótica conjuntiva<br>Encías (IG). Halitosis<br>Linfadenitis cervical | Cabeza vacía. Ojeras<br>Oído. Infección<br>Audición<br>Acúfenos<br>Vértigos<br>Dientes. Caries                                                                                                                                                                                                              | Ojos rojos. Infección. Estrabismo<br>Visión. Miopía. Glaucoma. Presbicia<br>Lágrimas<br>Cefaleas. Migrañas<br>Voz (volumen)<br>Vértigos. Acúfenos                                                                         | Lengua (movimiento, color, úlceras)<br>Tartamudez<br>Glositis. Absceso bucolingual<br>Voz (tono)                                                                                    | Párpados<br>Labios. Herpes. Saliva. Litiasis<br>Boca. Gingivitis. Aftas. Halitosis<br>Parotiditis. Amigdalitis. Faringitis<br>Lengua (grosor, capa)<br>Cabeza pesada. Cefalea en banda                                                                                                  |
| <b>Respiratorio</b>   | Pulmón. Bronquitis. Asma<br>Disnea<br>Tos<br>Esputo. Hemoptisis<br>Opresión tórax                                                                        |                                                                                                                                                                                                                                                                                                             | Alergia                                                                                                                                                                                                                   | Disnea de esfuerzo<br>Apnea                                                                                                                                                         | Tendencia a las alergias<br>Secreciones espesas<br>Moco. Esputo<br>Linfadenitis                                                                                                                                                                                                         |
| <b>Cardiovascular</b> | Sudor caliente por la noche                                                                                                                              | Hipertensión diastólica muy juntas<br>Edemas<br>Calor sube a la cabeza<br>Pies fríos o calientes<br>Frío en la espalda                                                                                                                                                                                      | Presión arterial<br>Sangre<br>H <i>Yin</i> almacena. Anemia. Varices<br>H <i>Yang</i> libera. Hemorragias<br>Extremidades adormecidas                                                                                     | Corazón. Ritmo. Palpitaciones<br>Angor pectoris. Infarto. Presión arterial<br>Circulación (manos). Calor 5 huecos<br>Sudor. Oloroso. Golondrinos.<br>Palmas<br>Anemia. Poliglobulia | Circulación periférica. Varices<br>Extremidades frías, cianóticas<br>Coagulación hematomas. Morados<br>Pequeñas hemorragias. Leucemias<br>Edemas                                                                                                                                        |
| <b>Digestivo</b>      | Picante<br>Deposiciones<br>Estreñimiento<br>Diarrea. Colitis ulcerosa<br>Ano. Tenesmo. Rectorragias<br>Hemorroides                                       | Salado<br>Diarrea matinal<br>Estreñimiento seco<br>Dipepsia                                                                                                                                                                                                                                                 | Vómitos. Náuseas<br>Bilis. Digestión grasas. Gases<br>Litiasis. Cólicos<br>Hemorroides<br>Ácido<br>Esfínteres<br>Dolor hipocondrio<br>Cirrosis. Hepatitis                                                                 | Amargo<br>Intestino delgado. Malabsorción<br>Diarrea tras ingesta<br>Enfermedad de Crohn<br>Dolor periumbilical                                                                     | Gusto. Sabor<br>Apetito. Ganas de comer. ( <i>Yang</i> B)<br>Hambre. Cantidad que come ( <i>Yin</i> E)<br>Sed. Temperatura alimentos<br>Dulce. Diabetes<br>Digestión. Náuseas. Vómitos. Gastritis<br>Espasmo piloro. Eructos. Hipo<br>Absorción. Diarrea. Ptosis E.<br>Nutrición cuerpo |
| <b>Genitourinario</b> |                                                                                                                                                          | Beber. Retención líquidos/sequedad cuerpo<br>Enuresis. Incontinencia orina<br>Cistitis. Litiasis. Nefritis<br>Menarquia. Menopausia<br>Ciclo. Hemorragias. Coágulos<br>Dismenorrea. Amenorrea<br>Abortos. Esterilidad. Partos. Anticoncepción<br>Frigidez. Impotencia sexual<br>Testículos. Fibroma uterino | Cantidad sangre. Hemorragias<br>Ciclos irregulares<br>Síndrome premenstrual<br>Órganos genitales externos<br>Herpes genital. Hidrocele. Varicocele<br>Esfínteres                                                          |                                                                                                                                                                                     | Ovarios. Quiste. Tumor. Tumor matriz<br>Ptosis útero. Aborto<br>Reglas. Dismenorrea. Coágulos<br><i>Spotting</i> . Leucorrea<br>Mamas. Tumor<br>Retención de líquidos<br>No sed. Polidipsia<br>Orquitis                                                                                 |
| <b>Locomotor</b>      | Flexor pulgar<br>Epicondilitis<br>Deltoides<br>Supraespinoso                                                                                             | Huesos. Osteoporosis. Fracturas<br>Crecimiento<br>Lumbar. Rigidez/debilidad sacrolumbar<br>Rodillas<br>Piernas<br>Pies. Rampas<br>Meningitis. Esclerosis múltiple                                                                                                                                           | Músculos (tono)<br>Tendones<br>Contracturas. Tics. Tortícolis<br>Temblor. Calambres. Parkinson<br>Articulaciones. Laxitud. Rigidez<br>Crujidos<br>Hemiplejía. Epilepsia<br>Ciática lateral. Coxalgia. Esguince de tobillo | Algoparestesia interna brazo<br>Algias cervicales<br>Algia omóplato                                                                                                                 | Músculos (nutrición). Amiotrofia<br>Ligamentos internos. Ptosis. Hernias<br>Tejido conjuntivo y conectivo<br>Cuerpo pesado<br>Inestabilidad<br>Desarrollo físico<br>Juanetes                                                                                                            |

|                            |                                                                                                                                                                  |                                                                              |                                                                                                                                          |                                                                                                                                                                   |                                                                                         |
|----------------------------|------------------------------------------------------------------------------------------------------------------------------------------------------------------|------------------------------------------------------------------------------|------------------------------------------------------------------------------------------------------------------------------------------|-------------------------------------------------------------------------------------------------------------------------------------------------------------------|-----------------------------------------------------------------------------------------|
| <b>Piel</b>                | Color. Grosor<br>Vitiligo. Bronceado<br>Sensibilidad. Urticaria. Prurito.<br>Alergia<br>Sudor<br>Lesiones. Psoriasis. Acné. Hongos<br>Verrugas. Eczemas<br>Vello | Cabello<br>Canas<br>Caída<br>Aspecto joven. Envejecimiento precoz            | Uñas<br>Calvicie<br>Alergia<br>Picores                                                                                                   | Manos cianóticas/rojas                                                                                                                                            | Piel (grosor)<br>Acné<br>Dermis. Tejido subcutáneo. Celulitis<br>Queloides<br>Ictericia |
| <b>Energía <i>Shen</i></b> | Tristeza<br>Lloros<br>Difícil eliminación<br>Anclado en el pasado                                                                                                | Miedo<br>Celos<br>Voluntad. Megalomanía<br>Hiperactividad<br>Sueños sexuales | Agresividad. Irascible<br>Tensión interna<br>Claridad ideas. Creativo<br>Depresión<br>Control del entorno<br>Adaptabilidad. Flexibilidad | Memorias. Ausencias<br>Inteligencia. Comprensión<br>Decisión<br>Dormir alerta. Sueños<br>Habla. Dislexias<br>Risa. Alegría. Humor. Euforia<br>Optimismo. Ansiedad | Preocupación<br>Obsesivo. Rituales<br>Reflexivo<br>Acumula cosas                        |
